# Supplementary material for: Split G-quadruplex-programmed label-free CRISPR-Cas12a sensing system
Source: Royal Society of Chemistry journal article supplement (doi:10.1039/d3cc01239e), 2023-01-01
Supplement: d3cc01239e1.pdf [file d3cc01239e1.pdf]

## **Supplementary Information**

### **Split G-quadruplex programmed label-free CRISPR-Cas12a sensing system**

Mengting Xu,<sup>§</sup> Yuedong Zhu,<sup>§</sup> Yan Zhang, Bin Gong, Yuliang Kang,  
Gaoxing Su\*, Yanyan Yu\*

<sup>1</sup> These authors contributed equally to this work.

School of pharmacy, Nantong University, Nantong 226001, Jiangsu  
Province, China.

E-mail: yuyanyan@ntu.edu.cn; sugaoxing@ntu.edu.cn

## **Experimental details**

### *1.1 Chemicals and reagents*

Streptavidin beads were purchased from Abmart. Cas12a and 10× NEBuffer 2.1 were purchased from New England Biolabs (Beijing). All reagents were used as received without further purification. Diethyl pyrocarbonate (DEPC) treated water and high fat transfection reagent were purchased from Sangon biotechnology company. Anti-CD63 mouse monoclonal antibody was purchase from Santa Cruz Biotechnology. Dulbecco's modified Eagle medium (DMEM), fetal bovine serum (FBS), 0.25% trypsin-EDTA, and antibiotics (penicillin-streptomycin) were purchased from Gibco (Grand Island, NY). ThT was purchased from Aladdin Reagent Corporation (Shanghai, China). Cell lines, including liver cancer HepG2, breast cancer MCF-7, cervical cancer HeLa were obtained from American Type Culture Collection.

### *Apparatus*

UV1800PC spectrophotometer (Shanghai, China) was used to quantify Oligonucleotide. Fluorescence signals were recorded on a RF-5301PC (Shimadzu) fluorospectro photometer. All DNA samples were annealed on an Applied Biosystems 96-well thermocycler. Native polyacrylamide gel electrophoresis (PAGE) was utilized to characterize the nucleic acids.

### *1.2 Nucleic acids*

All DNA oligonucleotides including 5-biotin-labeled aptamers CD63 (CD63-Apt-bio), epithelial cell adhesion molecule (EpCAM-Apt), prostate-specific membrane antigen (PSMA-Apt), and carcinoembryonic antigen (CEA-Apt), were synthesized and purified by Sangon Biotech (Shanghai, China). Tris-acetic acid-magnesium (1×TAMg) buffer (45 mM Tris-acetic acid and 7.6 mM magnesium acetate, pH 8.0) was used for all nucleic acids self-assemblies. All the nucleic acids used in this work were listed and illustrated in Table S1 and Fig. S1.

### *1.3 Exosomes isolation and characterization*

Exosomes secreted by MCF-7, HeLa, and HepG2 cells were isolated from the supernatant of cell culture dish by differential centrifugation. Impurities such as cells, dead cells and cell fragments were removed through 300 g centrifugation (4 °C, 10 min), 1000 g (4 °C, 10 min), and 10000 g (4 °C, 30 min). Then the supernatant was subjected to ultracentrifugation at 100000 g (4 °C, 70 min). The resulting supernatant was removed. The precipitate was dispersed in sterile PBS (pH 7.4) to perform the ultracentrifugation at 100000 g (4 °C, 70 min) again. Finally, the supernatant was removed, and the bottom precipitate was dispersed in 200 µL sterile PBS (pH 7.4) and stored at -80 °C until use. The concentration of exosomes was determined by nanoparticle tracking analysis (NTA) and their morphology was characterized with transmission electron microscopy (TEM).

#### *1.4 Native polyacrylamide gel electrophoresis (PAGE) characterization*

8% native PAGE was utilized in this work. The electrophoresis was conducted in 1× TBE buffer (89 mM Tris, 89 mM boric acid, 2 mM EDTA, pH 8.0). A constant voltage of 90 V was used for 80 min of electrophoresis before the gels were stained with 4S Red for imaging.

For the split G4 assembly process characterization: 6a, 6b, L4 were utilized here as the G4-a, G4-b, and Link, respectively. Equivalent of component strands (1  $\mu$ M each) were annealed in 1× TAMg buffer from 95 °C to 4 °C. The resulting samples were then analyzed with 8 % native (PAGE).

For the Cas12a *trans*-cleavage activity characterization: Cas12a (200 nM)/EpCAM-sgRNA (1  $\mu$ M) complex was pre-assembled in 1× NEBuffer 2.1. After adding EpCAM apt (1  $\mu$ M) and substrate chain (Link strand, 1  $\mu$ M), the obtained solution was incubated at 37 °C for 40 min before subjected for native PAGE.

#### *1.5 The investigation of spacer length*

The Link strand (1  $\mu$ M) with different spacer lengths (L0, L4, L8, L12, L16, L20, L24), 6a (1  $\mu$ M) and 6b (1  $\mu$ M) were added into the 1× NEBuffer 2.1 buffer containing 300 mM KCl with 5  $\mu$ M ThT. The resulting solution was incubated for 20 min before the fluorescence signals were recorded ( $\lambda_{\text{ex}}$ : 405 nm,  $\lambda_{\text{em}}$ : 485 nm).

#### *1.6 Optimization of the ThT/G4 ratio*

6a, 6b, L4 were utilized as the G4-a, G4-b, and Link, respectively. 6a, 6b, and L4 (1  $\mu$ M each) were added into the 1 $\times$  NEBuffer 2.1 buffer containing 300 mM KCl. Different amounts of ThT (0.2  $\mu$ M, 0.4  $\mu$ M, 0.6  $\mu$ M, 0.8  $\mu$ M, 1  $\mu$ M, 1.5  $\mu$ M, 2  $\mu$ M, 3  $\mu$ M, 5  $\mu$ M, 10  $\mu$ M, 20  $\mu$ M, 30  $\mu$ M) were added into the resulting split G4 complex. The fluorescence signals were recorded after 20 min ( $\lambda_{\text{ex}}$ : 405 nm,  $\lambda_{\text{em}}$ : 485 nm).

### *1.7 Exosomes detection*

The CD63 Apt-bio strand (4  $\mu$ M) was incubated with exosomes at room temperature for 30 min. Then streptavidin magnetic beads were added for incubation (1 h) before magnetic separation. The beads were then dispersed in 1 $\times$  NEBuffer 2.1 buffer. Atp 2 (EpCAM Apt, PSMA Apt or CEA Apt) was added to the above solution to reach a final concentration of 0.1  $\mu$ M. After 20 min reaction at 37°C, the magnetic beads were discarded. The residual supernatant was collected for Cas12a reaction. Taking EpCAM detection as an example, Cas12a (200 nM)/EpCAM-sgRNA (1  $\mu$ M) complex was pre-assembled in 1 $\times$  NEBuffer 2.1 before adding to the supernatant with L4 strand, which served as the substrate of Cas12a. After incubation at 37°C for 40 min, 6a (1  $\mu$ M), 6b (1  $\mu$ M) and ThT (5  $\mu$ M) were added into the solution along with 300 mM KCl. Six minutes later, the fluorescence was measured.

### *1.8 Clinical serum samples detection*

Serum samples, from healthy volunteers and breast cancer patients,

were provided by the Affiliated Hospital of Nantong University (Nantong, China). All experiments using human serum samples were performed in compliance with Nantong University's policy and ethics about human subjects. Human serum samples were collected from volunteers under the consent of the donors. These samples cannot be traced back to a specific person and the authors do not know the identity of the person(s) providing the sample. The samples were diluted with PBS before detected with the same procedure for exosome detections.

### *1.9 Cell culture*

MCF-7 and HeLa cells were cultured with DMEM complete medium, and HepG2 cells were cultured with 1640 complete medium (DMEM basic medium or 1640 basic medium with 10% fetal bovine serum and 1% penicillin and 100 µg/mL streptomycin mixed evenly). After dispersing the cells evenly in DMEM or 1640 complete medium, the cell culture dish was placed in the cell culture box (37°C humid environment, 5% CO<sub>2</sub>) for proliferation. When the cells covered 80% ~ 90% of the cell culture dish, remove the DMEM or 1640 complete medium. The dish was washed twice with sterile PBS, and then a certain amount of DMEM basic medium as added before placing in the cell culture box. After 48 hours of culture, all the liquid in the cell culture dish were taken out for exosomes isolation.

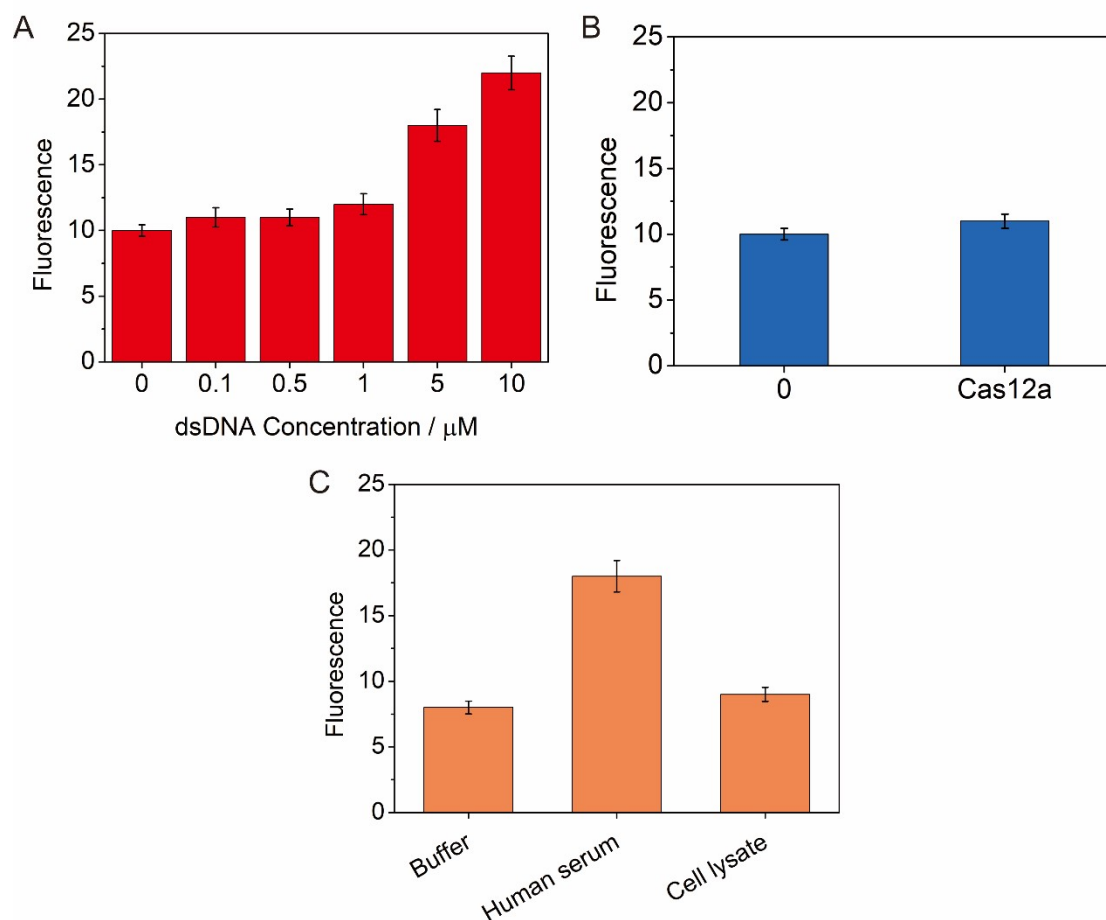

**Fig. S1** Nonspecific binding of ThT with dsDNA (A), Cas12a (B) and biological matrix (C). The dsDNA was obtained by annealing L4 and L4-C from 95 °C to 4 °C. 5  $\mu\text{M}$  ThT was utilized throughout the above binding experiments. 200 nM Cas12a was utilized in Fig. S1B. Human serum sample (from healthy volunteer) was obtained from local hospital and stored at -20 °C for usage. HeLa cells ( $1 \times 10^6 \text{ mL}^{-1}$ ) were lysed via low-frequency ultrasonic wave. For ThT binding assay in Fig. S1C, certain amount of cell lysate or human serum were spiked into the reaction buffer to reach a final volume ratio of 1% (v/v).

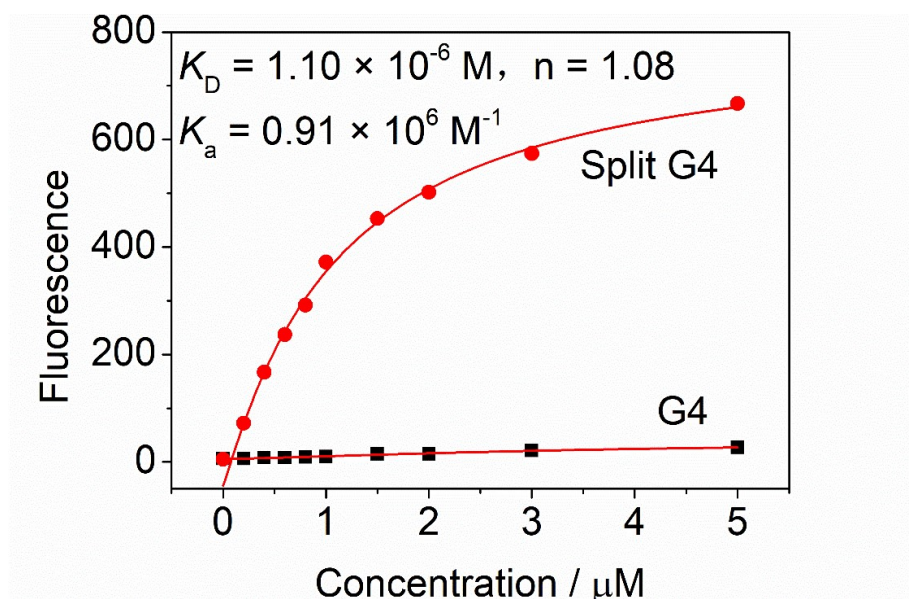

**Fig. S2** The ThT affinity with the intact T30695 and the split G4. Different concentrations of intact T30695 or the split G4 (0  $\mu\text{M}$ , 0.2  $\mu\text{M}$ , 0.4  $\mu\text{M}$ , 0.6  $\mu\text{M}$ , 0.8  $\mu\text{M}$ , 1  $\mu\text{M}$ , 1.5  $\mu\text{M}$ , 2  $\mu\text{M}$ , 3  $\mu\text{M}$  and 5  $\mu\text{M}$ ) were added into the ThT solution (5  $\mu\text{M}$ ) containing 300 mM  $\text{K}^+$ , respectively. After incubation at 37  $^{\circ}\text{C}$  for 6 min, the fluorescence signals were measured ( $\lambda_{\text{ex}}$ : 405 nm,  $\lambda_{\text{em}}$ : 485 nm). The ThT/split G4 binding curve was fitted with the

equation:

$$y = \text{START} + (\text{END} - \text{START}) \frac{x^n}{k^n + x^n}$$



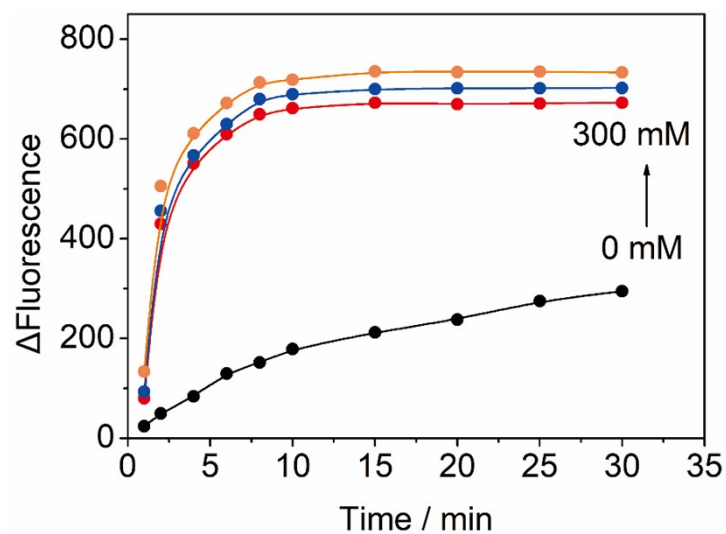

**Fig. S3** The influence of  $K^+$  on the fluorescence signal of split G4/ThT. Five-fold ThT was added into the pre-annealed split G4 solutions (G4-a, G4-b and L4, 1  $\mu$ M each) containing 0 mM, 100 mM, 200 mM, and 300 mM  $K^+$ , respectively. The fluorescence was recorded at an interval of 2 min (0-10 min) or 5 min (10-30 min).

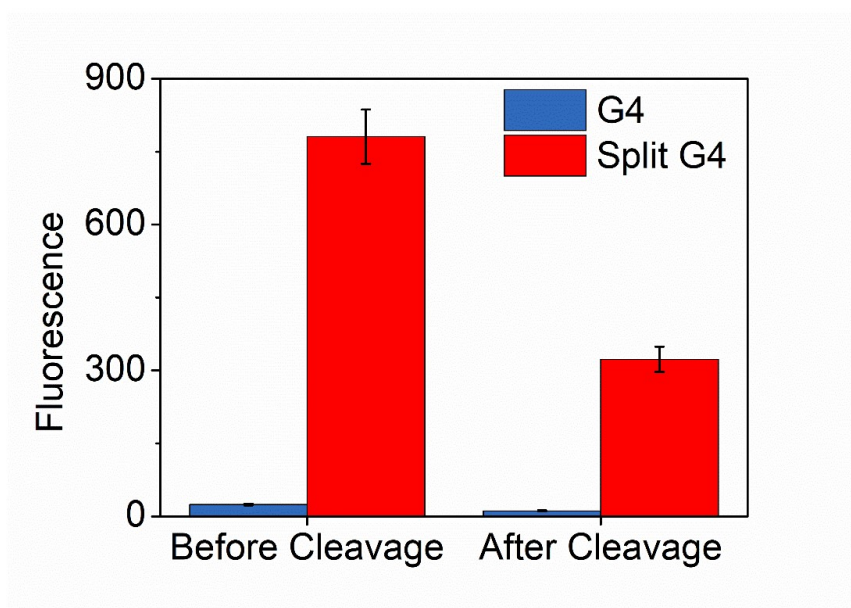

**Fig. S4** The cleavage of G4 and split G4 with Cas12a. Cas12a (200 nM)/EpCAM-sgRNA (1  $\mu$ M) complex was pre-assembled in 1 $\times$  NEBuffer 2.1 before adding G4 or link (without K<sup>+</sup>). After incubation at 37°C for 40 min, 6a (1  $\mu$ M), 6b (1  $\mu$ M) and ThT (5  $\mu$ M) were added into the solution along with 300 mM KCl. Six minutes later, the fluorescence was measured.

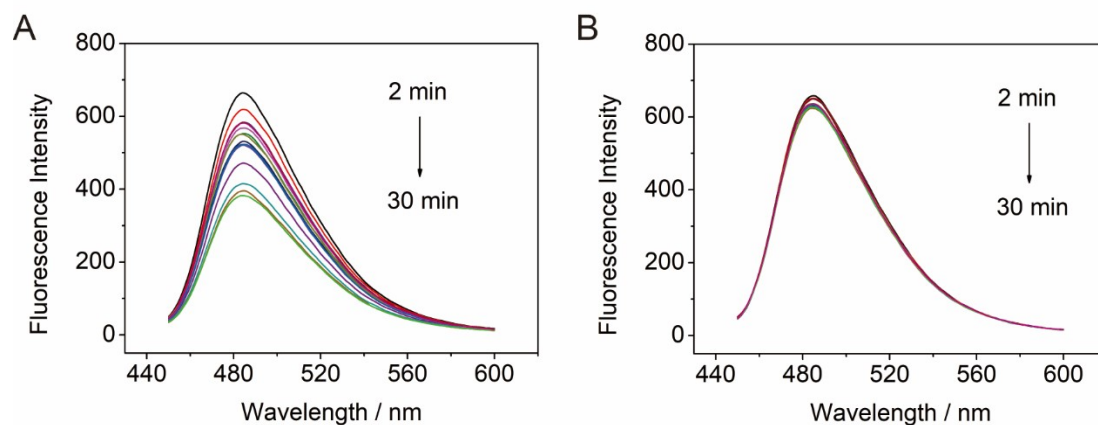

**Fig. S5** The stability of split G4/ThT under the cleavage of activated Cas12a in the presence of 100 mM (A) and 300 mM  $K^+$  (B). The fluorescence spectra were recorded at an interval of 2 min after the addition of Cas12a into the solution of split G4/ThT.

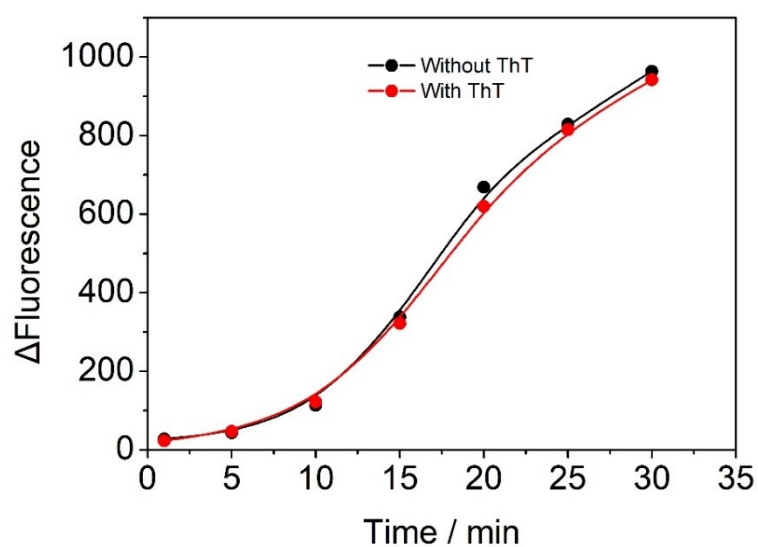

**Fig. S6** The influence of ThT on the trans-cleavage activity of Cas12a. FQ-labelled ssDNA (5'-FAM-TTATT-BHQ1-3') was utilized as the reporter substrate.

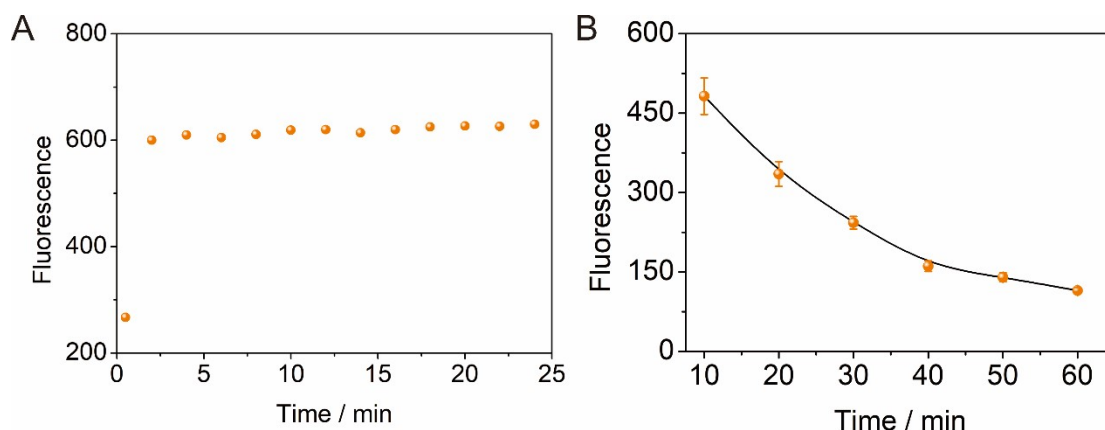

**Fig. S7** Time optimization of the reaction system. (A) Time optimization for split G4/ThT complex formation. Plot of the fluorescence intensity against the time after addition of 6a, 6b, L4 and ThT to the solution of activated Cas12a. (B) The *trans*-cleavage kinetic plot of Cas12a. Cas12a was pre-assembled with EpCAM-sgRNA. Then EpCAM-Apt and the L4 strand were added to the solution simultaneously to trigger the cleavage process. After cleavage for 10, 20, 30, 40, 50, and 60 min, respectively, 6a (1  $\mu$ M), 6b (1  $\mu$ M) and ThT (5 $\mu$ M) were added into solution along with 300 mM K<sup>+</sup>. After incubation for 6 min, the fluorescence intensities were measured. The error bars represented the standard deviations of three repetitive experiments.

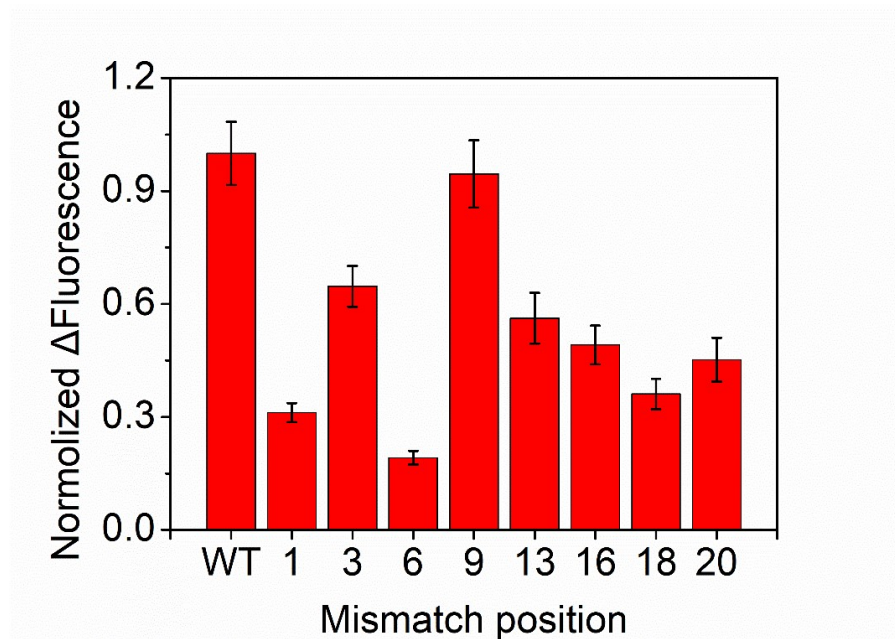

**Fig. S8** Specificity of the split G4 programmed Cas12a sensing system. Error bars represent mean  $\pm$  SD, where  $n = 3$  replicates. WT: wild type sequence without mismatch. The mismatch position was numbered from 5' to 3'.

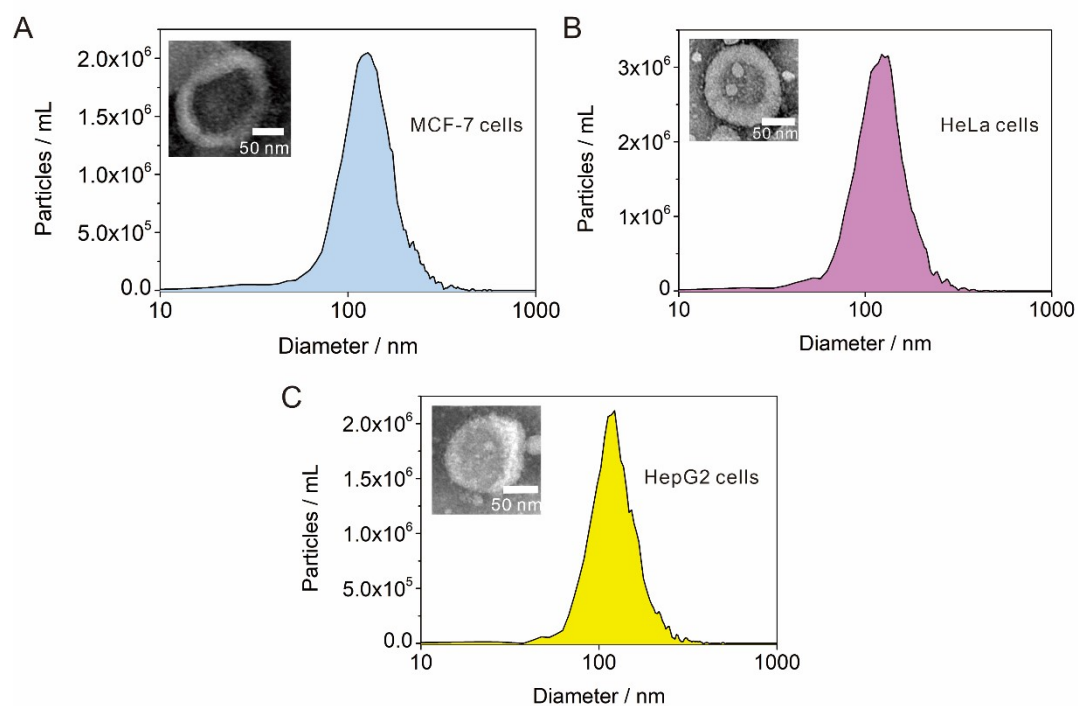

**Fig. S9** TEM and NTA characterization of exosomes derived from MCF-7 cells (A), HeLa cells (B) and HepG2 cells (C).

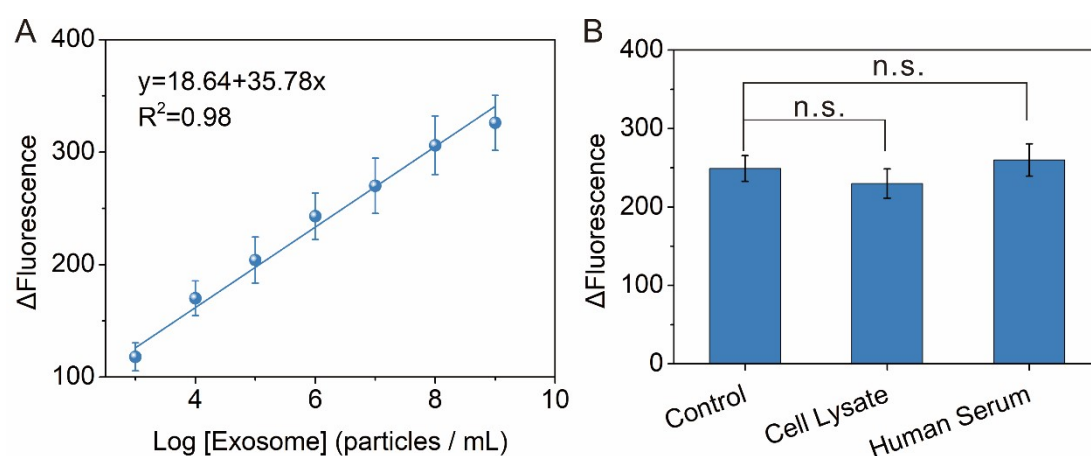

**Fig. S10** Exosomal protein detection with the split G4-programmed Cas12a strategy. (A) Calculation curve between the increased fluorescence intensity ( $\Delta F$ ) and the logarithm of the number of exosomes. (B) Detection of the tumor-derived exosomes in biological matrix spiked with 1% cell lysate or ultracentrifuged human serum. All measurements were repeated three times, and the data are are shown as the mean  $\pm$  standard deviation.



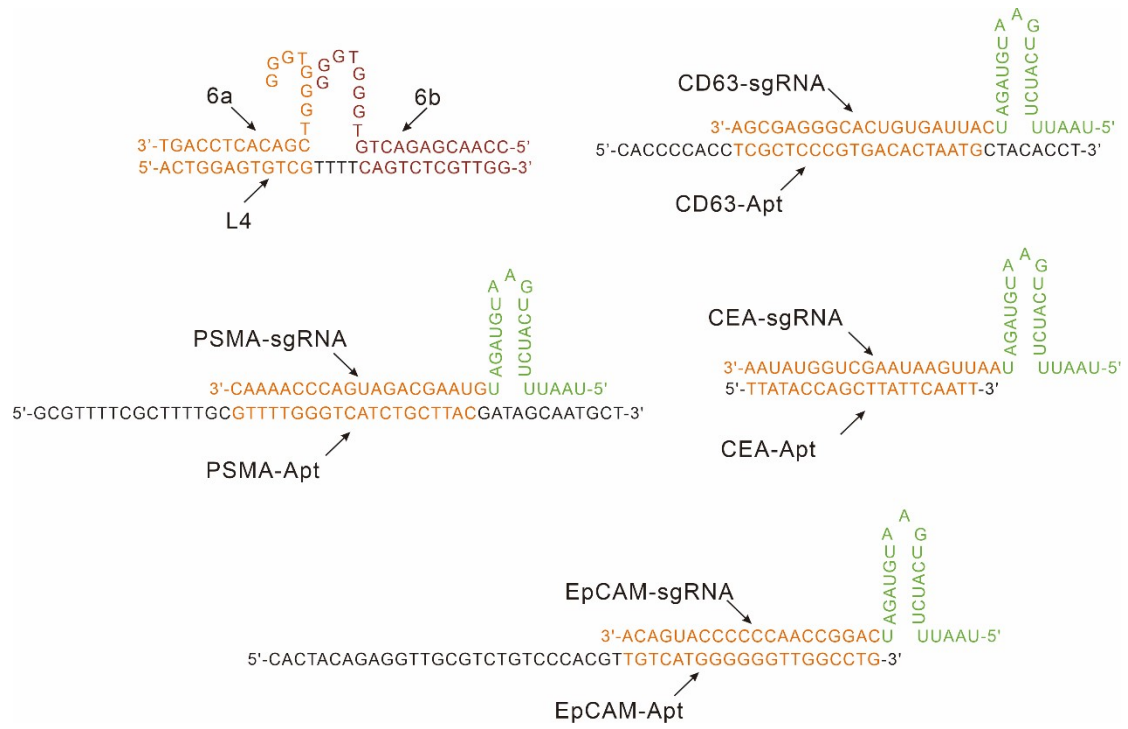

**Fig. S11** The illustration of the nucleic acids used in this work.

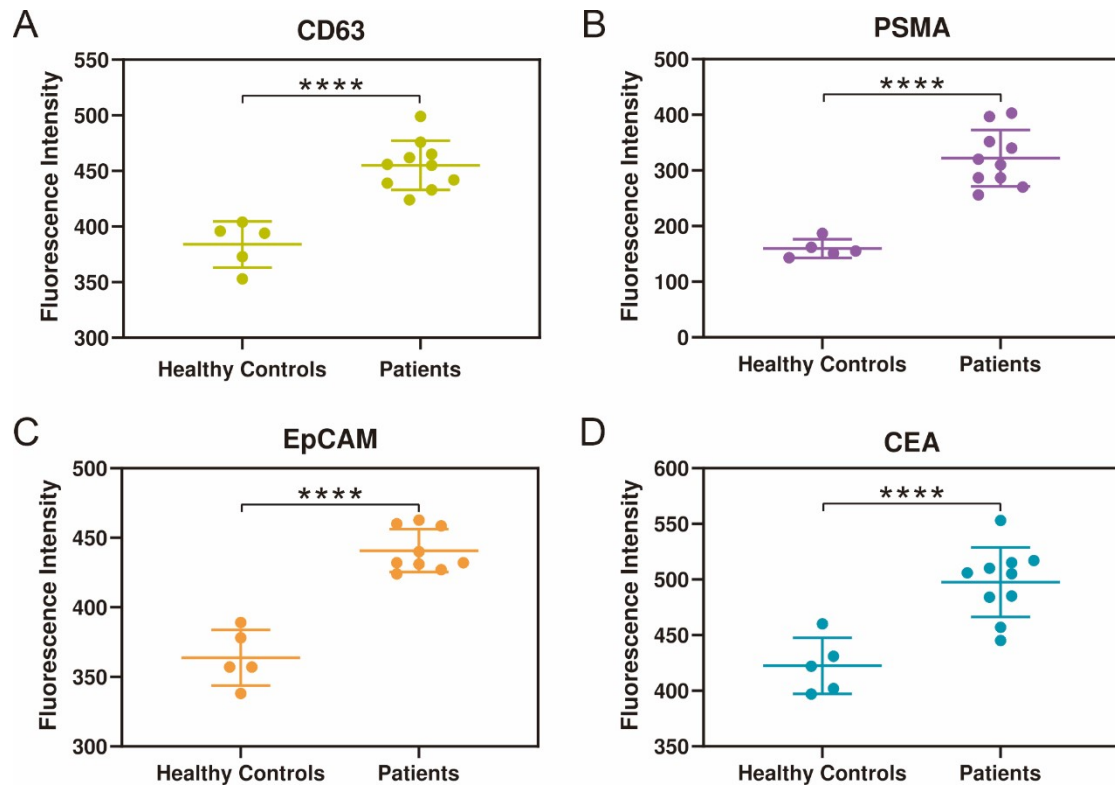

**Fig. S12** Exosomal protein profiling of clinical serum samples. The expression-level of CD63 (A), PSMA (B), EpCAM (C), and CEA (D) in the serum samples from healthy controls and breast cancer patients. (\*\*\*\*,  $P < 0.0001$ ).

**Table S1.** Sequences and oligonucleotides used in this work.

| Name | Sequences (5' to 3')                             |
|------|--------------------------------------------------|
| G4   | GGGTGGGTGGGTGGGT                                 |
| 6a   | CCAACGAGACTGTGGGTGGG                             |
| 6b   | GGGTGGGTCTGA CAC TCC AGT                         |
| 8a   | CCAACGAGACTGTGGGTGGGTGG                          |
| 4b   | GTGGGTCTGA CAC TCC AGT                           |
| 1a   | CCAACGAGACTGTG                                   |
| 11b  | GGTGGGTGGGTGGGTCTGA CAC TCC AGT                  |
| 2a   | CCAACGAGACTGTGG                                  |
| 10b  | GTGGGTGGGTGGGTCTGA CAC TCC AGT                   |
| 3a   | CCAACGAGACTGTGGG                                 |
| 9b   | GGGTGGGTGGGTCTGA CAC TCC AGT                     |
| 5a   | CCAACGAGACTGTGGGTGG                              |
| 7b   | GTGGGTGGGTCTGA CAC TCC AGT                       |
| L0   | ACTGGAGTGTCGCAGTCTCGTTGG                         |
| L4   | ACTGGAGTGTCGTTTTTCAGTCTCGTTGG                    |
| L4-C | CCAACGAGACTGAAAACGACACTCCAGT                     |
| L8   | ACTGGAGTGTCGTTTTTTTTTCAGTCTCGTTG<br>G            |
| L12  | ACTGGAGTGTCGTTTTTTTTTTTTTCAGTCTC<br>GTTGG        |
| L16  | ACTGGAGTGTCGTTTTTTTTTTTTTTTTTCAG<br>TCTCGTTGG    |
| L20  | ACTGGAGTGTCGTTTTTTTTTTTTTTTTTTTT<br>CAGTCTCGTTGG |
| L24  | ACTGGAGTGTCGTTTTTTTTTTTTTTTTTTTT                 |

|               |                                                                                  |
|---------------|----------------------------------------------------------------------------------|
|               | TTTTCAGTCTCGTTGG                                                                 |
| EpCAM-Apt     | CAC TAC AGA GGT TGC GTC TGT CCC ACG<br>TTG TCA TGG GGG GTT GGC CTG               |
| EpCAM-Apt-M1  | CACTACAGAGGTTGCGTCTGTCCCACGTAG<br>TCATGGGGGGGTTGGCCTG                            |
| EpCAM-Apt-M3  | CACTACAGAGGTTGCGTCTGTCCCACGTTG<br>ACATGGGGGGGTTGGCCTG                            |
| EpCAM-Apt-M6  | CACTACAGAGGTTGCGTCTGTCCCACGTTG<br>TCAAGGGGGGGTTGGCCTG                            |
| EpCAM-Apt-M9  | CACTACAGAGGTTGCGTCTGTCCCACGTTG<br>TCATGGCGGGGTTGGCCTG                            |
| EpCAM-Apt-M13 | CACTACAGAGGTTGCGTCTGTCCCACGTTG<br>TCATGGGGGGGATGGCCTG                            |
| EpCAM-Apt-M16 | CACTACAGAGGTTGCGTCTGTCCCACGTTG<br>TCATGGGGGGGTTGCCCTG                            |
| EpCAM-Apt-M18 | CACTACAGAGGTTGCGTCTGTCCCACGTTG<br>TCATGGGGGGGTTGGCGTG                            |
| EpCAM-Apt-M20 | CACTACAGAGGTTGCGTCTGTCCCACGTTG<br>TCATGGGGGGGTTGGCCTC                            |
| EpCAM-Apt-bio | Bio-<br>TTTTTTTTTTTTTTTCACTACAGAGGTTGCG<br>TCTGTCCCACGTTGTCATGGGGGGGTTGGCC<br>TG |
| EpCAM-sgRNA   | UAA UUU CUA CUA AGU GUA GAU CAG<br>GCC AAC CCC CCA UGA CA                        |
| CD63-Atp      | CACCCACCTCGCTCCCGT GAC ACT AAT<br>GCT ACA CCT                                    |

|                   |                                                                        |
|-------------------|------------------------------------------------------------------------|
| CD63-Atp-bio      | Bio-<br>TTTTTTTTTTTTTTTTCACCCACCTCGCTCCC<br>GT GAC ACT AAT GCT ACA CCT |
| CD63-sgRNA        | UAAUUUCUACUAAGUGUAGAU C AUU<br>AGU GUC ACG GGA GCG A                   |
| CEA-Apt           | TTATA CCA GCT TAT TCA ATT                                              |
| CEA-sgRNA         | UAA UUU CUA CUA AGU GUA GAU AAU<br>UGA AUA AGC UGG UAU AA              |
| PSMA-Apt          | GCG TTT TCG CTT TTG CGT TTT GGG TCA<br>TCT GCT TAC GAT AGC AAT GCT     |
| PSMA-sgRNA        | UAA UUU CUA CUA AGU GUA GAU GUA<br>AGC AGA UGA CCC AAA AC              |
| FQ-labelled ssDNA | FAM-TTATT-BHQ1                                                         |

**Table S2.** Comparison with reported methods for the exosome detection.

| No. | Method                                                   | Sample type                                 | LOD<br>(particles/<br>mL) | Dynamic range<br>(particles/mL)            | Reference   |
|-----|----------------------------------------------------------|---------------------------------------------|---------------------------|--------------------------------------------|-------------|
| 1   | DNA motor                                                | MCF-7 cell-<br>derived exosomes<br>in PBS   | $8.2 \times 10^3$         | $20 \sim 2 \times 10^6$                    | [1]         |
| 2   | ExoAPP <sup>a</sup>                                      | HepG2 cell-<br>derived exosomes<br>in PBS   | $1.6 \times 10^5$         | $1.6 \times 10^5 \sim 1.6 \times 10^8$     | [2]         |
| 3   | CRISPR/Cas12a                                            | A549 cell-derived<br>exosomes in PBS        | Not<br>Provided           | $3 \times 10^3 \sim 6 \times 10^7$         | [3]         |
| 4   | Covalent organic<br>frameworks based<br>nanoprobe        | Colo 205 cell-<br>Derived Exosome<br>in PBS | $1.60 \times 10^5$        | $5 \times 10^5 \sim 10^{10}$               | [4]         |
| 5   | zirconium-<br>mediated<br>fluorescence<br>method         | HeLa cell-derived<br>exosomes in PBS        | $7.6 \times 10^6$         | $1.68 \times 10^7 \sim 4.2 \times 10^{10}$ | [5]         |
| 6   | DNAzyme<br>walker-amplified<br>electrochemical<br>method | MCF-7 cell-<br>derived exosomes<br>in PBS   | $1.3 \times 10^4$         | $5 \times 10^4 \sim 1.0 \times 10^{10}$    | [6]         |
| 7   | Split G4<br>programmed<br>Cas12a                         | MCF-7 cell-<br>derived exosomes<br>in PBS   | 258.8                     | $10^3 \sim 10^{11}$                        | Our<br>work |

<sup>a</sup> exosome-oriented, aptamer nanoprobe-based profiling assay.

**Table S3.** Standard addition analysis for tumor-derived exosomes in 1% ultracentrifuged human serum.

| <b>Samples</b> | <b>Added<br/>(Particles / mL)</b> | <b>Recovered<br/>(Particles / mL)</b> | <b>Rate of<br/>recovery (%)</b> | <b>RSD<br/>(%)</b> |
|----------------|-----------------------------------|---------------------------------------|---------------------------------|--------------------|
| 1              | $1.0 \times 10^8$                 | $0.946 \times 10^8$                   | 94.6                            | 8.4                |
| 2              | $1.0 \times 10^6$                 | $1.052 \times 10^6$                   | 105.2                           | 9.7                |
| 3              | $1.0 \times 10^4$                 | $0.954 \times 10^4$                   | 95.4                            | 10.5               |

<sup>a</sup> Values represented mean of three measurements.

## References :

- [1] Y. Yu, W.S. Zhang, Y. Guo, H. Peng, M. Zhu, D. Miao, G. Su, Engineering of exosome-triggered enzyme-powered DNA motors for highly sensitive fluorescence detection of tumor-derived exosomes, *Biosensors and Bioelectronics* 167 (2020) 112482.
- [2] D. Jin, F. Yang, Y.L. Zhang, L. Liu, Y.J. Zhou, F.B. Wang, G.J. Zhang, ExoAPP: Exosome-Oriented, Aptamer Nanoprobe-Enabled Surface Proteins Profiling and Detection, *Analytical Chemistry* 90 (24) (2018) 14402-14411.
- [3] X. Zhao, W. Zhang, X. Qiu, Q. Mei, Y. Luo, W. Fu, Rapid and sensitive exosome detection with CRISPR/Cas12a, *Analytical and Bioanalytical Chemistry* 412(3) (2020) 601-609.
- [4] M. Wang, Y. Pan, S. Wu, Z. Sun, L. Wang, J. Yang, Y. Yin, G. Li, Detection of colorectal cancer-derived exosomes based on covalent organic frameworks, *Biosensors and Bioelectronics* 169 (2020) 112638.
- [5] L. Wang, Y. Yang, Y. Liu, L. Ning, Y. Xiang, G. Li, Bridging exosome and liposome through zirconium-phosphate coordination chemistry: a new method for exosome detection, *Chemical Communications* 55(18) (2019) 2708-2711.
- [6] L. Zhao, R.J. Sun, P. He, X.R. Zhang, Ultrasensitive Detection of Exosomes by Target-Triggered Three-Dimensional DNA Walking



Machine and Exonuclease III-Assisted Electrochemical Ratiometric  
Biosensing, *Analytical Chemistry* 91(22) (2019) 14773-14779.
